# Supplementary material for: Saringosterol from Sargassum fusiforme Modulates Cholesterol Metabolism and Alleviates Atherosclerosis in ApoE-Deficient Mice
Source: MDPI journal article supplement (doi:10.3390/md19090485), 2021-08-26
Supplement: s1 [file s1]

| <i>primer</i> | <i>sequence</i>                 |
|---------------|---------------------------------|
| 18S F         | 5'-ACCGCAGCTAGGAATAATGGA-3'     |
| 18S R         | 5'-CAAATGCTTTTCGCTCTGGTC-3'     |
| ABCA1 F       | 5'-GCTTGTTGGCCTCAGTTAAGG-3'     |
| ABCA1 R       | 5'-GTAGCTCAGGCGTACAGAGAT-3'     |
| ABCG1 F       | 5'-CTTTCCTACTCTGTACCCGAGG-3'    |
| ABCG1 R       | 5'-CGGGGCATTCCATTGATAAGG-3'     |
| ABCG5 F       | 5'-AGGGCCTCACATCAACAGAG-3'      |
| ABCG5 R       | 5'-GCTGACGCTGTAGGACACAT-3'      |
| ABCG8 F       | 5'-CTGTGGAATGGGACTGTACTTC-3'    |
| ABCG8 R       | 5'-GTTGGACTGACCACTGTAGGT-3'     |
| ACC1 F        | 5'-TGTCCACCCAAGCATTTCTTC-3'     |
| ACC1 R        | 5'-CATCCAACACCAGTTCAGTATACGT-3' |
| CYP27A1 F     | 5'-AGGGCCTCACATCAACAGAG-3'      |
| CYP27A1 R     | 5'-GCTGACGCTGTAGGACACAT-3'      |
| CYP7A1 F      | 5'-GAGAGTGAATCAGGGGACCA-3'      |
| CYP7A1 R      | 5'-TCAGGAATGGAGGGTTTCAG-3'      |
| CYP7B1 F      | 5'-GGAGCCACGACCCTAGATG-3'       |
| CYP7B1 R      | 5'-TGCCAAGATAAGGAAGCCAAC-3'     |
| CYP8B1 F      | 5'-GGGAGTGGGTGGAAGTGAG-3'       |
| CYP8B1 R      | 5'-GTCCTGCATGGATGAAGCT-3'       |
| chREBP F      | 5'-CACTCAGGGAATACACGCCTAC-3'    |
| chREBP R      | 5'-ATCTTGGTCTTAGGGTCTTCAGG-3'   |
| FASN F        | 5'-AAGCGGTCTGGAAAGCTGAA-3'      |
| FASN R        | 5'-AGGCTGGGTTGATACCTCCA-3'      |
| Hmgcr F       | 5'-AGCTTGCCCGAATTGTATGTG-3'     |
| Hmgcr R       | 5'-TCTGTTGTGAACCATGTGACTTC-3'   |
| IDOL F        | 5'-TGTGGAGCCTCATCTCATCTT-3'     |
| IDOL R        | 5'-AGGGACTCTTTAATGTGCAAG-3'     |
| LDLR F        | 5'-TGA CTCAGACGAACAAGGCTG-3'    |
| LDLR R        | 5'-ATCTAGGCAATCTCGGTCTCC-3'     |
| NPC1L1 F      | 5'-ATCCTCATCCTGGGCTTTGC-3'      |
| NPC1L1 R      | 5'-GCAAGGTGATCAGGAGGTTGA-3'     |
| SCD1 F        | 5'-CCCTGCGGATCTTCCTTATC-3'      |
| SCD1 R        | 5'-TGTGTTTCTGAGAACTTGTGGTG-3'   |
| SR-B1 F       | 5'-CACTACGCGCAGTATGTGCT-3'      |
| SR-B1 R       | 5'-TGAATGGCCTCCTTATCCTG-3'      |
| SREBP-1c F    | 5'-AAGCAAATCACTGAAGGACCTGG-3'   |
| SREBP-1c R    | 5'-AAAGACAAGCTACTCTGGGAG-3'     |
| SREBP2 F      | 5'-GCGTTCTGGAGACCATGGA-3'       |
| SREBP2 R      | 5'-ACAAAGTTGCTCTGAAAACAAATCA-3' |
